# Supplementary material
Source: PubMed Central journal article supplement (PMC3323138)
Supplement: embor2011251s2.pdf [file embor2011251s2.pdf]

Manuscript EMBOR-2011-35126

## **Nuclear IGF1R is a transcriptional co-activator of LEF1/TCF**

Dudi Warsito, Sandra Andersson, Olle Larsson and Bitá Sehat

*Corresponding author: Bitá Sehat, Karolinska Institutet*

---

**Review timeline:**

Submission date:

08 June 2011

Accepted:

01 December 2011

---

**No Peer Review Process File is available with this article, as the authors have chosen not to make the review process public in this case.**
